# Supplementary material
Source: publisher figshare collection journal article supplement (https://acs.figshare.com/ndownloader/files/9529435)
Supplement: Supplementary file 1 [file 9529435]

## Supporting Information

### Preparation of a Sulfur-Functionalized Microporous Polymer Sponge and *in situ* Growth of Silver Nanoparticles: a Compressible Monolithic Catalyst

Jong Gil Kim, Min Chul Cha, Jeongmin Lee, Taejin Choi, and Ji Young Chang\*

Department of Materials Science and Engineering, College of Engineering, Seoul National  
University, Seoul 08826, Korea

E-mail: jichang@snu.ac.kr

**Table S1.** Elemental compositions of the MOP sponge and S-MOPS measured by elemental analysis.

|                | C (wt%) | H (wt%) | S (wt%) |
|----------------|---------|---------|---------|
| the MOP sponge | 67.6    | 1.8     | 0       |
| S-MOPS         | 66.4    | 2.6     | 14.1    |

**Table S2.** Examples of monolithic catalysts for the reduction of 4-nitrophenol.

|                | $M_{act}$ | Support  | $k (s^{-1}) * 10^{-3}$ | Reference                                        |
|----------------|-----------|----------|------------------------|--------------------------------------------------|
| S-MOPS-Ag      | Ag        | MOP      | 7.61                   | This work (with the compression-release process) |
| Au-DA-polyHIPE | Au        | polyHIPE | 6.3                    | 1                                                |
| Ag/carbon      | Ag        | carbon   | 4.92                   | 2                                                |
| Pt-polyHIPE    | Pt        | polyHIPE | 3.5                    | 3                                                |

$M_{act}$ : active metal, polyHIPE: poly(high internal phase emulsion)

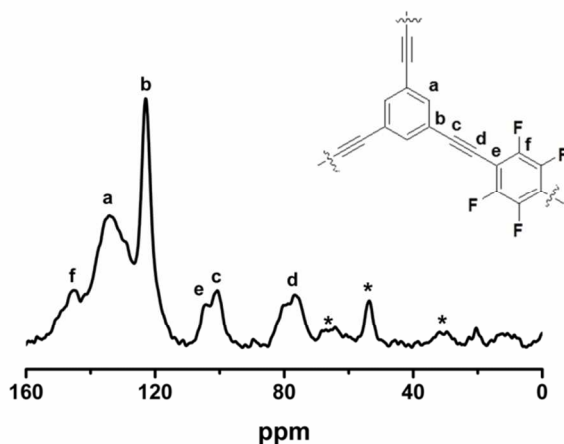

**Figure S1.** Solid state  $^{13}C$  CP/MAS NMR spectrum of the MOP sponge.

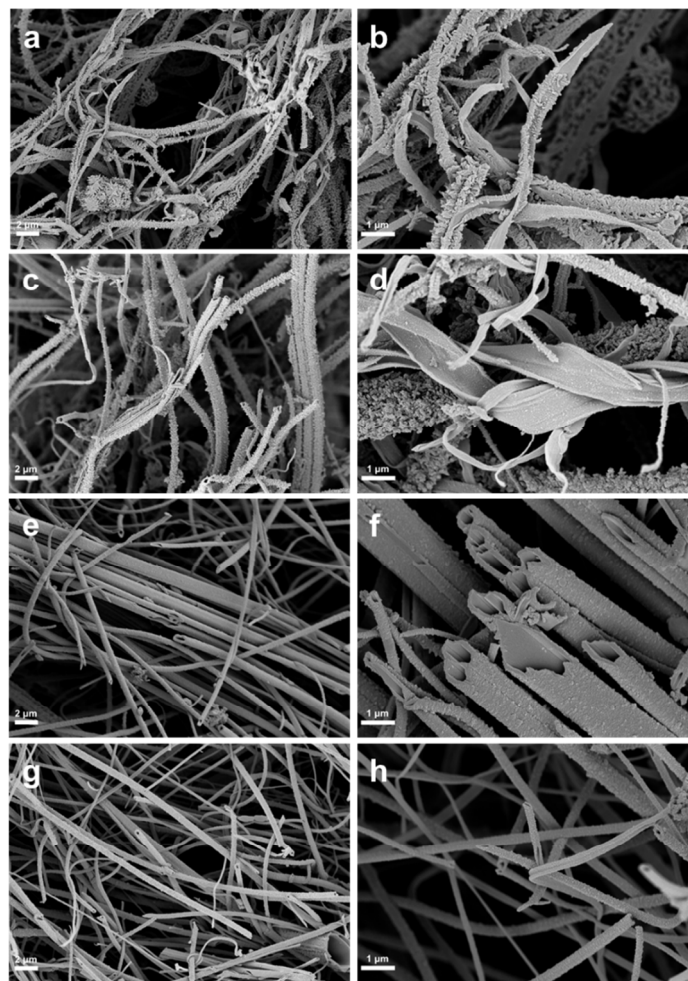

**Figure S2.** SEM images of the MOP sponge measured after a reaction time of (a, b) 1h, (c, d) 1.5 h, (e, f) 2 h, and (g, h) 3 h.

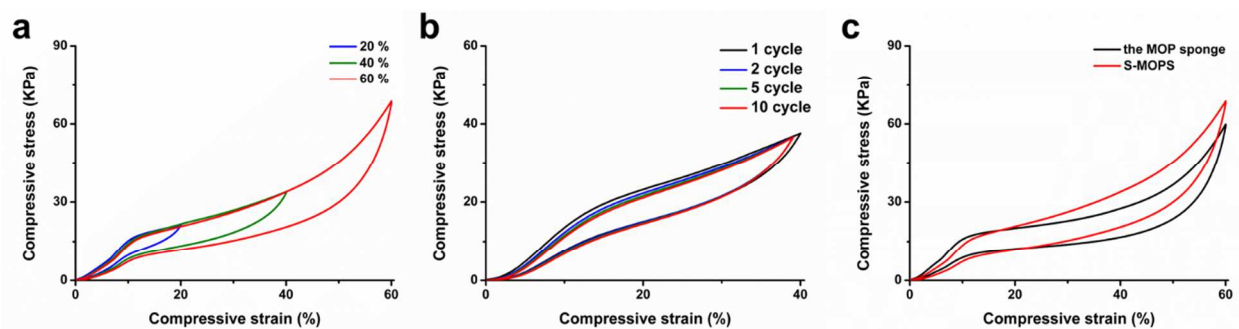

**Figure S3.** a) Compressive stress-strain curves (maximum strain = 20, 40 and 60 %) and b) 10 cycles of the loading-unloading test results of S-MOPS (maximum strain = 40 %). c) Comparison of hysteresis curves of the MOP sponge and S-MOPS at 40 %.

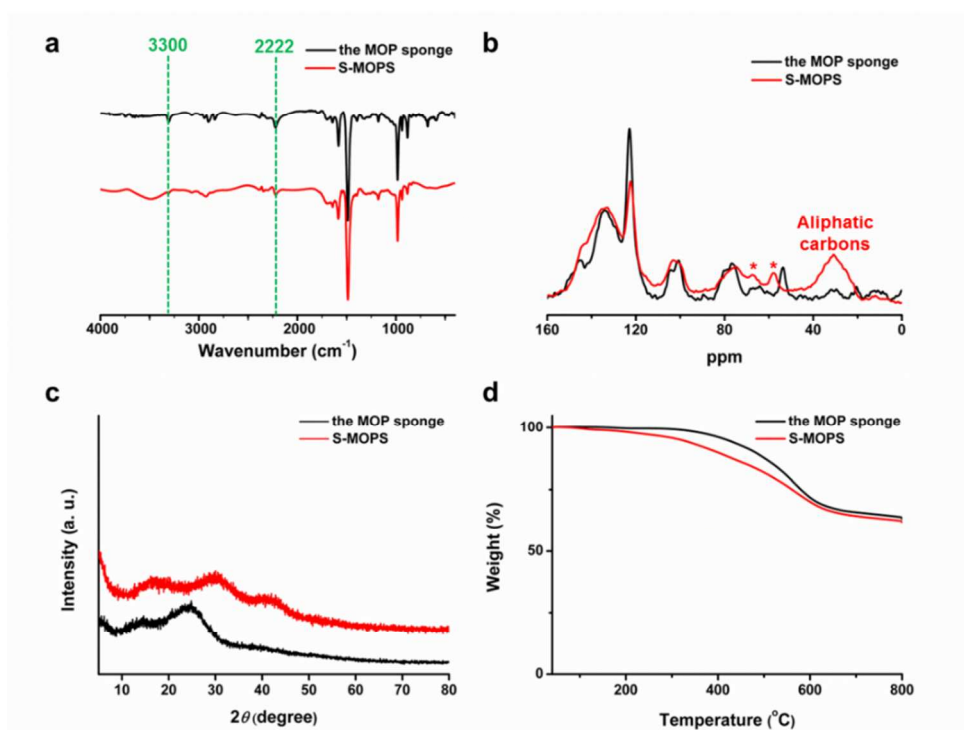

**Figure S4.** a) FT-IR spectra, b) Solid state  $^{13}\text{C}$  CP/MAS NMR spectra, c) PXRD patterns and d) TGA thermograms of the MOP sponge and S-MOPS.

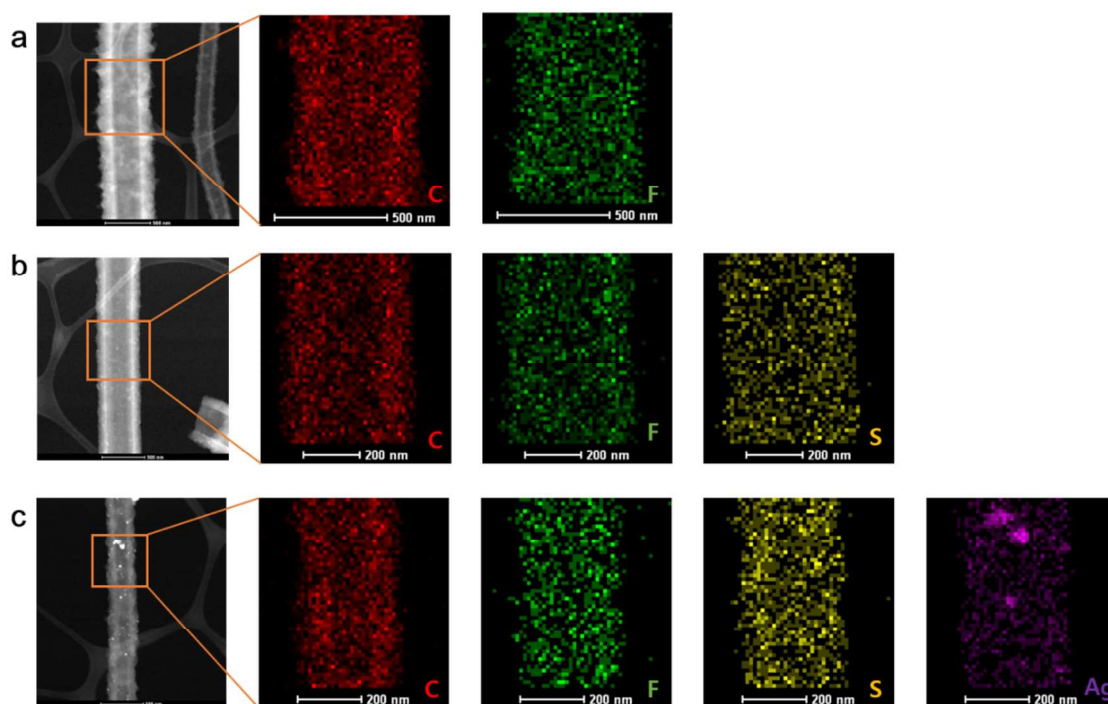

**Figure S5.** TEM-EDS elemental mapping of (a) the MOP sponge, (b) S-MOPS, and (c) S-MOPS-Ag.

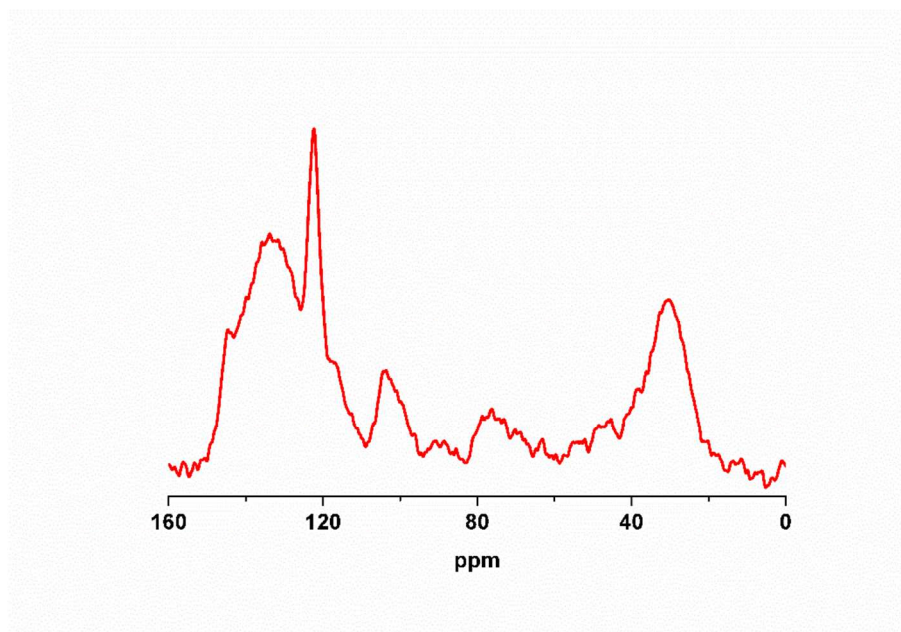

**Figure S6.** Solid state  $^{13}\text{C}$  CP/MAS NMR spectrum of S-MOPS-Ag.

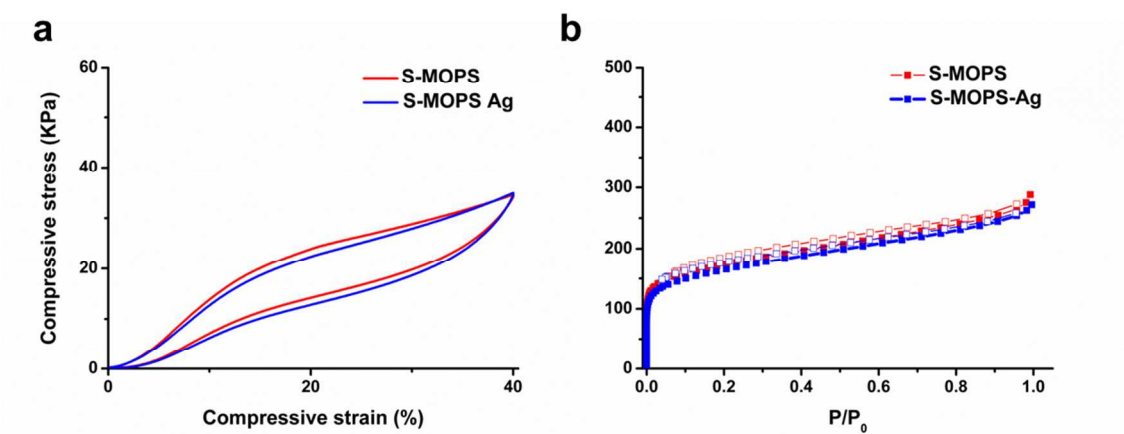

**Figure S7.** a) Compressive stress-strain curves (maximum strain = 40%) and b)  $\text{N}_2$  adsorption-desorption isotherms measured at 77 K of S-MOPS and S-MOPS-Ag.

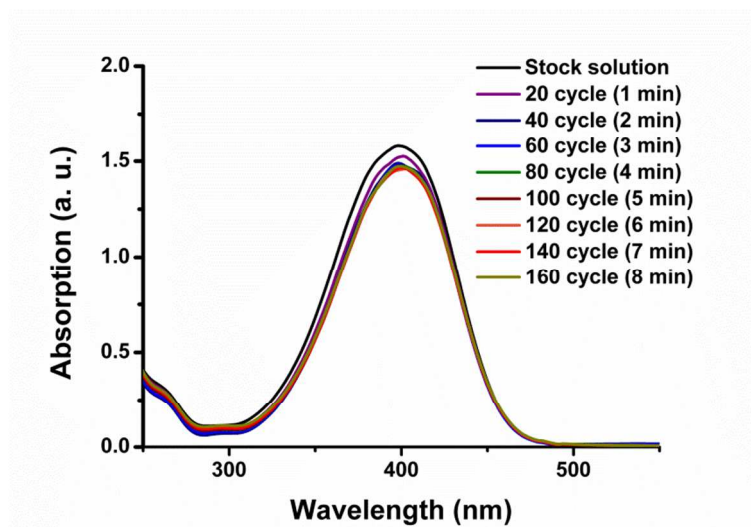

**Figure S8.** UV-Vis spectra of the aqueous 4-NP solution (initial concentration =  $1 \times 10^{-4}$  M) measured during the reaction with the repeated compression and release of S-MOPS.

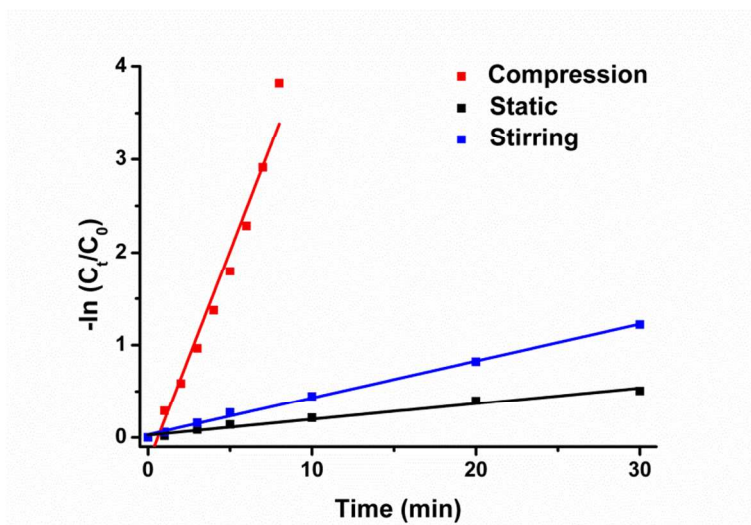

**Figure S9.** Plots of  $-\ln(C_t / C_0)$  versus time during the catalytic reduction of 4-NP by S-MOPS-Ag under different reaction conditions. With the compression-release process, the apparent rates constant ( $k$ ) for the reaction =  $7.61 \times 10^{-3} \text{ s}^{-1}$ . Without the compression and release process,  $k = 2.84 \times 10^{-4} \text{ s}^{-1}$  when the reaction solution was not stirred and  $k = 6.64 \times 10^{-4} \text{ s}^{-1}$  when the reaction solution was stirred.

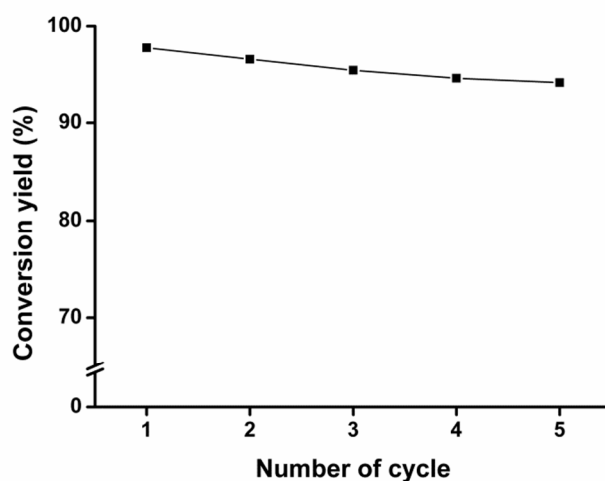

**Figure S10.** Change in the catalytic activity of S-MOPS-Ag during recycling.

#### References

- (1) Ye, Y.; Jin, M.; Wan, D. One-Pot Synthesis of Porous Monolith-Supported Gold Nanoparticles as an Effective Recyclable Catalyst, *J. Mater. Chem. A*, **2015**, 3, 13519–13525.
- (2) Katiyar, S.; Mondal, K.; Sharma, A. One-Step Sol–Gel Synthesis of Hierarchically Porous, Flow-Through Carbon/Silica Monoliths, *RSC Adv.*, **2016**, 6, 12298-12310.
- (3) Liu, H.; Wan, D.; Du, J.; Jin, M. Dendritic Amphiphile Mediated One-Pot Preparation of 3D Pt Nanoparticles-Decorated PolyHIPE as a Durable and Well-Recyclable Catalyst, *ACS Appl. Mater. Interfaces*, **2015**, 7, 20885–20892.
